# Supplementary material for: Influences on the rotated structure of diiron dithiolate complexes: electronic asymmetry vs. secondary coordination sphere interaction
Source: Royal Society of Chemistry journal article supplement (doi:10.1039/c0dt01332c), 2011-01-01
Supplement: c0dt01332c.pdf [file c0dt01332c.pdf]

Supporting Information for

**Influences on the Rotated Structure of the Diiron Dithiolate Complexes:  
Electronic Asymmetry vs. Secondary Coordination Sphere Interaction**

**Yu-Chiao Liu,<sup>†</sup> Ling-Kuang Tu,<sup>†</sup> Tao-Hung Yen,<sup>†</sup> Gene-Hsiang Lee,<sup>‡</sup> Ming-Hsi  
Chiang<sup>\*,†</sup>**

<sup>†</sup>*Institute of Chemistry, Academia Sinica, Nankang, Taipei 115, Taiwan, and*

<sup>‡</sup>*Instrumentation Center, National Taiwan University, Taipei 106, Taiwan*

**Table of content**

**Table S1.** X-ray Crystallographic Data after SQUEEZE refinement

**Table S1.** X-ray Crystallographic Data after SQUEEZE refinement

|                                                          | [4](TFA) <sub>2</sub>                                                                                                       | [5](OTf) <sub>2</sub>                                                                                                       |
|----------------------------------------------------------|-----------------------------------------------------------------------------------------------------------------------------|-----------------------------------------------------------------------------------------------------------------------------|
| Empirical formula                                        | C <sub>78</sub> H <sub>80</sub> F <sub>6</sub> Fe <sub>4</sub> N <sub>2</sub> O <sub>12</sub> P <sub>4</sub> S <sub>4</sub> | C <sub>78</sub> H <sub>84</sub> F <sub>6</sub> Fe <sub>4</sub> N <sub>2</sub> O <sub>14</sub> P <sub>4</sub> S <sub>6</sub> |
| Formula weight                                           | 1826.96                                                                                                                     | 1927.11                                                                                                                     |
| <i>T</i> , K                                             | 150(2)                                                                                                                      | 150(2)                                                                                                                      |
| Crystal system                                           | Monoclinic                                                                                                                  | Triclinic                                                                                                                   |
| Space group                                              | <i>P</i> 2 <sub>1</sub> / <i>n</i>                                                                                          | <i>P</i> -1                                                                                                                 |
| <i>a</i> , Å                                             | 17.133(3)                                                                                                                   | 16.4839(5)                                                                                                                  |
| <i>b</i> , Å                                             | 13.281(2)                                                                                                                   | 17.0452(5)                                                                                                                  |
| <i>c</i> , Å                                             | 23.904(4)                                                                                                                   | 21.2654(4)                                                                                                                  |
| <i>α</i> , °                                             | 90                                                                                                                          | 94.2320(2)                                                                                                                  |
| <i>β</i> , °                                             | 107.252(8)                                                                                                                  | 108.7318(14)                                                                                                                |
| <i>γ</i> , °                                             | 90                                                                                                                          | 113.5410(11)                                                                                                                |
| <i>V</i> , Å <sup>3</sup>                                | 5194.5(15)                                                                                                                  | 5045.1(2)                                                                                                                   |
| <i>Z</i>                                                 | 2                                                                                                                           | 2                                                                                                                           |
| <i>ρ</i> <sub>calcd</sub> , Mg m <sup>-3</sup>           | 1.168                                                                                                                       | 1.269                                                                                                                       |
| <i>μ</i> , mm <sup>-1</sup>                              | 0.747                                                                                                                       | 0.814                                                                                                                       |
| <i>F</i> (000)                                           | 1880                                                                                                                        | 1984                                                                                                                        |
| Reflections collected                                    | 20998                                                                                                                       | 63604                                                                                                                       |
| Independent reflections                                  | 9021                                                                                                                        | 17651                                                                                                                       |
| <i>R</i> <sub>int</sub>                                  | 0.0900                                                                                                                      | 0.0826                                                                                                                      |
| Goodness-of-fit on <i>F</i> <sup>2</sup>                 | 1.006                                                                                                                       | 1.064                                                                                                                       |
| R1 [ <i>I</i> > 2σ( <i>I</i> )] (all data) <sup>a</sup>  | 0.0759 (0.1371)                                                                                                             | 0.0791 (0.1309)                                                                                                             |
| wR2 [ <i>I</i> > 2σ( <i>I</i> )] (all data) <sup>b</sup> | 0.1645 (0.1808)                                                                                                             | 0.2196 (0.2346)                                                                                                             |

<sup>a</sup> R1 = (Σ||*F*<sub>o</sub>|-|*F*<sub>c</sub>||)/(Σ|*F*<sub>o</sub>|). <sup>b</sup> wR2 = [Σw(*F*<sub>o</sub><sup>2</sup>-*F*<sub>c</sub><sup>2</sup>)<sup>2</sup>/Σw(*F*<sub>o</sub><sup>2</sup>)<sup>2</sup>]<sup>1/2</sup>.
